# Supplementary material for: A Novel Point-Of-Care Cytokine Biomarker Lateral Flow Test for the Screening for Sexually Transmitted Infections and Bacterial Vaginosis: Study Protocol of a Multi-Centre Multi-Disciplinary Prospective Clinical Study to Evaluate the Performance and Feasibility of the Genital Inflammation Test (GIFT)
Source: Research Square preprint supplement (doi:10.21203/rs.3.rs-3675671/v1), 2023-12-06
Supplement: Supplementary file 1 [file af83e742ff545da63527d6b4.pdf]

## SCREENING

Explanation about the study to women attending family planning

## CONSENT

- Verification of inclusion / exclusion criteria
- Consent signature
- Collection of urine sample for pregnancy test

## DATA COLLECTION

Questionnaire : **Case Report Form (CRF)**

- Module 1 : Screening and Enrollment
- Module 2 : Sociodemographic Information
- Module 3 : Behavioral Risk Assessment
- Module 4 : General health and medical history including medication, smoke and alcohol
- Module 5 : Pregnancy and Contraception History
- Module 6 : HIV testing/status and treatment
- Module 7 : Gynaecological Physical Exam
- Module 8 : Sample collection and results

## SAMPLE COLLECTION

- Vaginal swabs sample collection
- pH and smear slide
- GIFT Test near the patient
- Finger prick blood sample collection for HIV test

## LABORATORY ANALYSIS

- GIFT test in the laboratory -Test reading using a lateral flow test automated reader
- STI/BV tests : NAAT for CT/NG/TV
- Nugent scoring
- HIV test

## LABORATORY RESULTS

- Treatment according syndromic approach OR appreciation of clinician
- Treatment of the participant and partners
- If positive HIV test : refer the participant to clinician
